# Supplementary material for: Ultra-low-dose intraoperative X-ray imager for minimally invasive surgery: a pilot imaging study
Source: PubMed Central journal article supplement — Transl Lung Cancer Res. 2022 Apr;11(4):588–99. doi: 10.21037/tlcr-21-909 (PMC9073745; doi:10.21037/tlcr-21-909), 2022-04
Supplement: tlcr-11-04-588-dss.pdf [file tlcr-11-04-588-dss.pdf]

## Data Sharing Statement

|                     |                                                                                                                                                     |                                                                                                             |
|---------------------|-----------------------------------------------------------------------------------------------------------------------------------------------------|-------------------------------------------------------------------------------------------------------------|
| <b>Article Info</b> | <a href="https://dx.doi.org/10.21037/tlcr-21-909">https://dx.doi.org/10.21037/tlcr-21-909</a>                                                       |                                                                                                             |
| <b>Item</b>         | <b>Question</b>                                                                                                                                     | <b>Authors' Response<br/>(place "-" if not applicable)</b>                                                  |
| 1                   | Would you like to share data collected for your study to others?                                                                                    | Yes.                                                                                                        |
| 2                   | If not, would you like to share the reason for your decision?                                                                                       | -                                                                                                           |
| 3                   | What data in particular will be shared?                                                                                                             | Preclinical and clinical data regarding our research, Performance evaluation data of our device.            |
| 4                   | Any other documents will be shared? Such as study protocol, statistical analysis plan, informed consent form, clinical study report, analytic code. | -                                                                                                           |
| 5                   | When will data availability begin?                                                                                                                  | From the publication date                                                                                   |
| 6                   | When will data availability end?                                                                                                                    | Two years within the publication date, since the technique may be updated over time.                        |
| 7                   | To whom will you share the data?                                                                                                                    | For people who are interested in our device.                                                                |
| 8                   | For what type of analysis or purpose?                                                                                                               | -                                                                                                           |
| 9                   | How or where can the data/documents be obtained?                                                                                                    | E-mails could be sent to the address below to obtain shared data:<br>kimhyunkoo@korea.ac.kr, jaes@snu.ac.kr |
| 10                  | Any other restrictions?                                                                                                                             | -                                                                                                           |
